# Supplementary material for: Dietary Supplementation of Fruit from Nitraria tangutorum Improved Immunity and Abundance of Beneficial Ruminal Bacteria in Hu Sheep
Source: MDPI journal article supplement (doi:10.3390/ani12223211), 2022-11-19
Supplement: s1 [file s1]

**Figure S1**

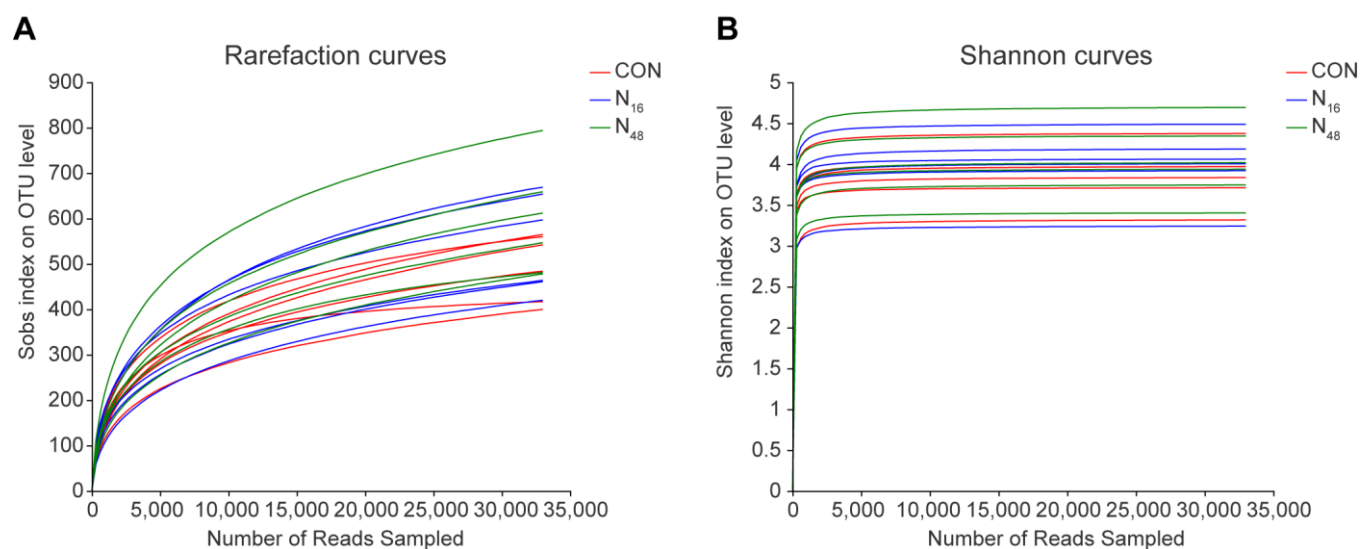

**Figure S1.** Effects of *Nitraria tangutorum* (FNT) addition on rarefaction curves in rumen fluid in Hu rams.
